# Supplementary material
Source: PubMed Central journal article supplement (PMC6851290)
Supplement: supp_RA119.010835_155494_2_supp_400411_pycfxr.pdf [file supp_RA119.010835_155494_2_supp_400411_pycfxr.pdf]

Mice Lacking Epidermal Retinol Dehydrogenases SDR16C5 and SDR16C6 Display Accelerated Hair Growth and Enlarged Meibomian Glands.

**Lizhi Wu, Olga V. Belyaeva, Mark K. Adams, Alla V. Klyuyeva, Seung-Ah Lee, Kelli R. Goggans, Robert A. Kesterson, Kirill M. Popov, Natalia Y. Kedishvili**

SUPPORTING INFORMATION

1. Table S1
2. Table S2
3. Figure S1
4. Figure S2
5. Figure S3
6. Figure S4
7. Figure S5

**Table S1. A list of primers used for generating expression constructs and for screening and genotyping of knockout mouse strains.**

| <b>Primers for expression constructs</b>                                                            |                                 |                                                |
|-----------------------------------------------------------------------------------------------------|---------------------------------|------------------------------------------------|
| Construct                                                                                           | Primer name                     | Primer sequence (restriction sites underlined) |
| mRDHE2/pBluescript II SK (-)                                                                        | mE2_Sall_F                      | TTT <u>GTCGACATGTCTCAA</u> AAACCTGGA           |
| mRDHE2/pBluescript II SK (-)                                                                        | mE2_XbaI_R                      | TTTTCTAGATTAAGTTTTCTTTCTTTTG                   |
| mRDHE2-His/pVL1393                                                                                  | mE2_XbaI_F                      | AAATCTAGAAATGTCTCAA <u>AAACCTGGA</u>           |
| mRDHE2-His/pVL1393                                                                                  | mE2_NotI_R                      | AATAATGCGGCCGCAGTTTTCTTCT                      |
| mRDHE2S-His/pVL1393                                                                                 | mE2S_BamHI_F                    | ATCGGATCCATGAATTCAGTGGCA                       |
| mRDHE2S-His/pVL1393                                                                                 | mE2S_NotI_R                     | ATCGCGGCCGCCTTGCTCTTTCCTTT                     |
| mRDHE2-FLAG/pCMV-tag4A, mRDHE2-FLAG/pCS105                                                          | mE2_EcoRI_F                     | TTTGAATTCATGTCTCAA <u>AAACCTGGA</u> A          |
| mRDHE2-FLAG/pCMV-tag4A                                                                              | mE2_XhoI_R                      | TTTCTCGAGAGTTTTCTTCTTTTGCC                     |
| mRDHE2-FLAG/pCS105                                                                                  | FLAG_XbaI_R                     | TACTCTAGACTACTTATCGTCGTCATC                    |
| <b>Primers for <i>Rdhe2s</i><sup>-/-</sup> strain</b>                                               |                                 |                                                |
|                                                                                                     | Primer name                     | Primer sequence                                |
| <b>Screening of ES cells by long-range PCR</b>                                                      |                                 |                                                |
| 5' arm                                                                                              | E2Sscreen1F                     | GGCATCTGGGATCTAACGTTTCTCCA                     |
|                                                                                                     | E2Sscreen1R                     | AGCAGGCCACCCAAGTACCT                           |
| 3' arm                                                                                              | R2R                             | TCTATAGTCGCAGTAGGCGG                           |
|                                                                                                     | Sdr16c6genoR2                   | GCTGGCAAGCTTCTTTACAGCCA                        |
| <b>Genotyping of <i>Rdhe2s</i><sup>-/-</sup> "knockout first" strain</b>                            |                                 |                                                |
| WT allele                                                                                           | WT F                            | GGCATTGTGGCATGGGAAGTATG                        |
|                                                                                                     | WT R                            | GCAGGAAGGAAGGCCTTACAAGTC                       |
| "Knockout first" allele                                                                             | WT F                            | GGCATTGTGGCATGGGAAGTATG                        |
|                                                                                                     | KO R (LAR3)                     | CACAACGGGTTCTTCTGTTAGTCC                       |
| <b>Genotyping of <i>Rdhe2s</i><sup>-/-</sup> strain</b>                                             |                                 |                                                |
| WT allele                                                                                           | WT F                            | GGCATTGTGGCATGGGAAGTATG                        |
|                                                                                                     | WT R                            | GCAGGAAGGAAGGCCTTACAAGTC                       |
| KO (Flp, Cre-excised) allele                                                                        | WT F                            | GGCATTGTGGCATGGGAAGTATG                        |
|                                                                                                     | KO <sup>FLP/CRE excised</sup> R | ACTGATGGCGAGCTCAGACC                           |
| <b>Primers for CRISPR-generated <i>Rdhe2</i><sup>-/-</sup>;<i>Rdhe2s</i><sup>-/-</sup> founders</b> |                                 |                                                |
|                                                                                                     | Primer name                     | Primer sequence                                |
| <b>Screening of targeted exons:</b>                                                                 |                                 |                                                |
| Exon 2, <i>Sdr16c6</i>                                                                              | Sdr16c6ex2F                     | CAACATGAATTCAGTGGCAGACACA                      |
|                                                                                                     | Sdr16c6ex2R                     | TGATCAGCAACTCTGTAGACCTC                        |
| Exon 5, <i>Sdr16c6</i>                                                                              | Sdr16c6ex5F                     | ATACTCTGTCCTCAAGGATAAACC                       |
|                                                                                                     | Sdr16c6ex5R                     | GAGGAAGAGCTCACTTACTTGGT                        |
| Exon 2, <i>Sdr16c5</i>                                                                              | Sdr16c5ex2F                     | CCAGAACATGTCTCAA <u>AAACCTG</u> G              |

|                                            |                |                             |
|--------------------------------------------|----------------|-----------------------------|
|                                            | Sdr16c5ex2R    | GGTCAGCCACTCTGTACACTT       |
| Exon 5, <i>Sdr16c5</i>                     | Sdr16c5ex5F    | CAGACTATTGTGCAAGTAAATTCGC   |
|                                            | Sdr16c5ex5R    | TGGGCAGAGAGTAAATTTGAATGCC   |
| <b>Screening for large deletions:</b>      |                |                             |
| Pair 1                                     | Sdr16c6ex2F    | CAACATGAATTCAGTGGCAGACACA   |
|                                            | Sdr16c6ex5R    | GAGGAAGAGCTCACTTACTTGGT     |
| Pair 2                                     | Sdr16c6ex2F    | CAACATGAATTCAGTGGCAGACACA   |
|                                            | Sdr16c5ex2R    | GGTCAGCCACTCTGTACACTT       |
| Pair 3                                     | Sdr16c6ex2F    | CAACATGAATTCAGTGGCAGACACA   |
|                                            | Sdr16c5ex5R    | TGGGCAGAGAGTAAATTTGAATGCC   |
| Pair 4                                     | Sdr16c6ex5F    | ATACTCTGTCCTCAAGGATAAACC    |
|                                            | Sdr16c5ex5R    | TGGGCAGAGAGTAAATTTGAATGCC   |
| Pair 5                                     | Sdr16c5ex2F    | CCAGAACATGTCTCAAAACCTGG     |
|                                            | Sdr16c5ex5R    | TGGGCAGAGAGTAAATTTGAATGCC   |
| Pair 6                                     | Sdr16c5ex4F    | GGTCTTCTTAGATGTATAAAGCCT    |
|                                            | Sdr16c5ex6R    | CATGGAAACTGGTGCTGTACCT      |
| <b>Additional exons:</b>                   |                |                             |
| Exon 5, <i>Sdr16c5</i>                     | Sdr16c5ex3F    | CCAGGTTAAGAAAGAAGTTGGTG     |
|                                            | Sdr16c5ex3R    | CACCCATAAATGTGCTTTGAAATTGAC |
| Exon 4, <i>Sdr16c5</i>                     | Sdr16c5ex4F    | GGTCTTCTTAGATGTATAAAGCCT    |
|                                            | Sdr16c5ex4R    | ACACTGTGGGAGGCAGACC         |
| Exon 6, <i>Sdr16c5</i>                     | Sdr16c5ex6F    | TAGGTGTCTACTCTGTTACCA       |
|                                            | Sdr16c5ex6R    | CATGGAAACTGGTGCTGTACCT      |
| Exon 3, <i>Sdr16c6</i>                     | Sdr16c6ex3F    | CTGACAATGCTCCCAGCAAG        |
|                                            | Sdr16c6ex3R    | AATGCAGAGAATTCTGATGCTCAC    |
| Exons 4 and 5, <i>Sdr16c6</i>              | Sdr16c6ex4-5F  | GCTGTATACTTCTACTTTCCTGC     |
|                                            | Sdr16c6ex4-5R  | TAAGAGTAGAGGAAGAGCTCACT     |
| Exon 6, <i>Sdr16c6</i>                     | Sdr16c6ex6F    | GAACCTCTGTGTTGTCATTCCAG     |
|                                            | Sdr16c6ex6R    | TCTTGAGAGGCCACATGATG        |
| Exon 7, <i>Sdr16c6</i>                     | Sdr16c6ex7F    | GGTGGTATGCTTCCATTGAGC       |
|                                            | Sdr16c6ex7R    | GGCAGGATTATGAAAGGCCAG       |
| <b>Genotyping of DKO1 and DKO2 strains</b> |                |                             |
| WT allele                                  | Sdr16c5ex5F    | CAGACTATTGTGCAAGTAAATTCGC   |
|                                            | Sdr16c5ex5R    | TGGGCAGAGAGTAAATTTGAATGCC   |
| DKO1 allele                                | Sdr16c6ex5F    | ATACTCTGTCCTCAAGGATAAACC    |
|                                            | Sdr16c5ex5R    | TGGGCAGAGAGTAAATTTGAATGCC   |
| DKO2 allele                                | Sdr16c5intr4F4 | CTTGAGATAATCAACTGAAAGGAG    |
|                                            | Sdr16c5intr5R2 | GAATGGGTCTGAATGGCATTACG     |

**Table S2. CRISPR target sequences.**

|                               | <b>Target sequence</b>           |
|-------------------------------|----------------------------------|
| <b><i>Sdr16c6</i>, Exon 2</b> |                                  |
| CRISPR1                       | AACTAAAGTGGCCCCGTGGC <i>TGG</i>  |
| CRISPR2                       | CAATATGGAAACCTGTAGAC <i>TGG</i>  |
| <b><i>Sdr16c6</i>, Exon 5</b> |                                  |
| CRISPR1                       | TCATTATCATAGTTAATTCA <i>AGG</i>  |
| CRISPR2                       | TGCCCCTATTTTCATCAAAAC <i>TGG</i> |
| <b><i>Sdr16c5</i>, Exon 2</b> |                                  |
| CRISPR1                       | TCACCGGCAACGTTCTTCCG <i>TGG</i>  |
| CRISPR2                       | ATAGTGCTCATAACAGGTGC <i>TGG</i>  |
| <b><i>Sdr16c5</i>, Exon 5</b> |                                  |
| CRISPR1                       | CATAGATTCTGCAAATCCAA <i>GGG</i>  |
| CRISPR2                       | CACTTGCCAAGAAACAATGG <i>GGG</i>  |

Nucleotides in italics represent the protospacer adjacent motif (PAM), the sequence required for CRISPR/Cas9.

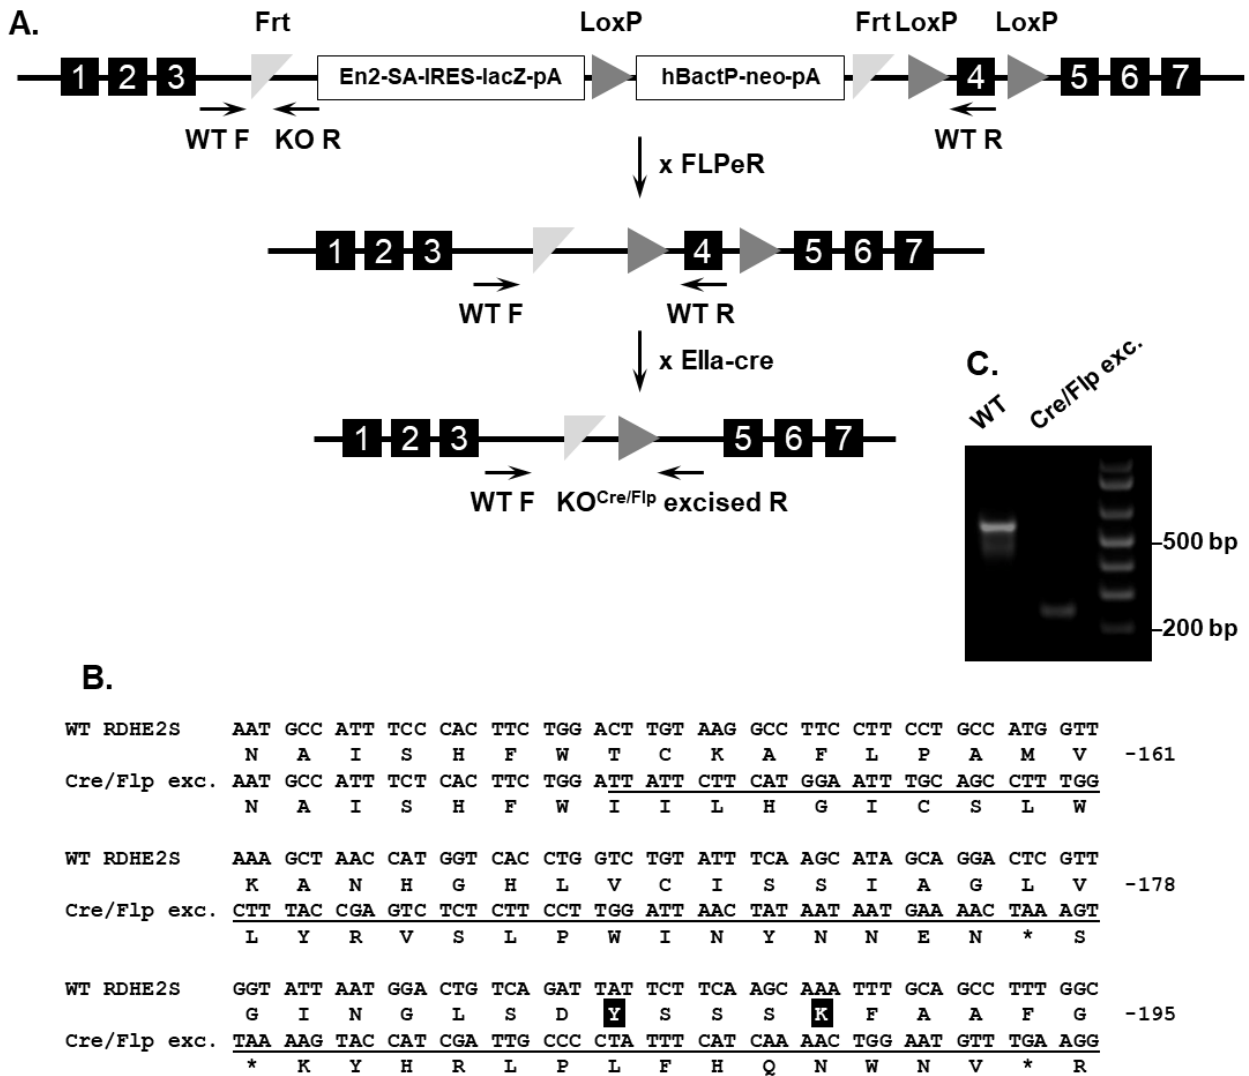

**Figure S1. Generation of *Rdhe2s*<sup>-/-</sup> mice.** **A.** Diagram of targeting construct for production of *Rdhe2s*<sup>-/-</sup> mice. Mice carrying the “knockout first” *Rdhe2s* mutant allele (*Sdr16c6*<sup>tm1a(KOMP)Wtsi</sup>) were mated with FLPeR mice carrying a gene encoding FLP recombinase. The progeny was mated with Ella-cre mice, which carry a gene encoding Cre recombinase. **B.** Sequences of wild type and null alleles of *Rdhe2s* beginning at codon for residue N145. The mutant sequence is underlined starting at residue 152. Catalytic residues are shown in white on black background. The null allele contains a frameshift mutation and aberrant stop codon at L177 (indicated by \*), resulting in a truncated protein that lacks catalytic residues. **C.** Gel electrophoresis of PCR products confirming the Cre and Frt excision. Wild type allele was amplified using primers WT F and WT R; null allele was amplified using primers WT F and KO<sup>FLP/CRE</sup> excised R.

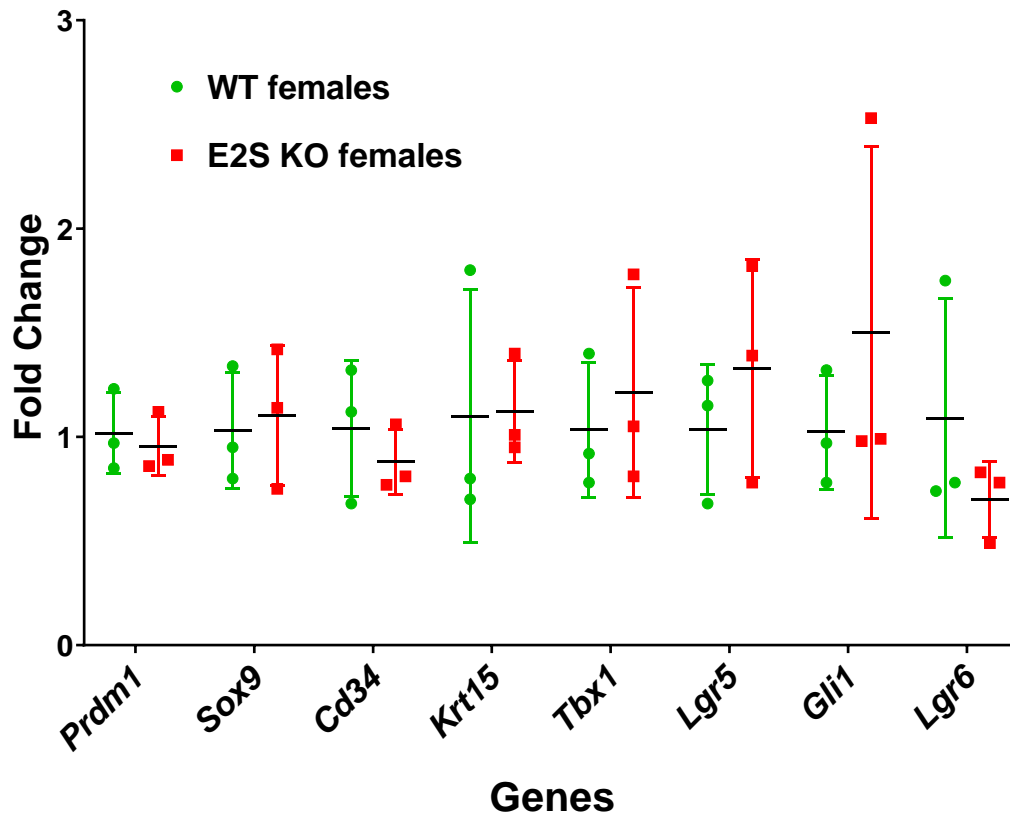

**Figure S2. QPCR analysis of genes expressed in hair follicles and sebaceous glands.** QPCR was performed using skin from *Rdhe2s*<sup>-/-</sup> (E2S KO) female mice (n=3) and their littermates (n=3) (~10 weeks old) fed chow diet as described under *Experimental Procedures*. The differences in gene expression were not statistically significant. Expression levels were normalized per *Hprt*.

**Figure S3. Protein sequences encoded by CRISPR-Cas9 – generated alleles**

**RDHE2S :**

|      |        |                       |                  |                      |                 |                |               |     |     |
|------|--------|-----------------------|------------------|----------------------|-----------------|----------------|---------------|-----|-----|
|      |        | 10                    | 20               | 30                   | 40              | 50             | 60            | 70  | 80  |
| WT   | RDHE2S | MNSVADTAIFFGKFLYYFLES | LVFKVIPKRKKDVS   | GEIVLITGAGSGLRLLAIHF | FASHGATLVLWDINQ | EGNMETCRLV     |               |     |     |
| DKO1 | RDHE2S | MNSVADTAIFFGKFLYYFLES | LVFKVIPKRKKDVS   | GEIVLITGAGSGLRLLAIHF | FASHGATLVLWDINQ | EGNMETCRLV     |               |     |     |
| DKO2 | RDHE2S | MNSVADTAIFFGKFLYYFLES | LVFKVIPKRKKDVS   | GEIVLITGAGSGLRLLAIHF | FASHGATLVLWDINQ | EGNMETCQTK     |               |     |     |
|      |        | 90                    | 100              | 110                  | 120             | 130            | 140           | 150 | 160 |
| WT   | RDHE2S | KQKGDVKVFAYKDCSSRIE   | VYRVADQVKKEE     | VDVTILINNAGVVTGKS    | SFLNTPDHLVEKSF  | LVNAISHFWTCKA  | FLPAM         |     |     |
| DKO1 | RDHE2S | KQKGDVKVFAYKDCSSRIE   | VYRVADQVKKEE     | VDVTILINNAGVVTGKS    | SFLNTPDHLVEKSF  | LVNAISHFWTCKA  | FLPAM         |     |     |
| DKO2 | RDHE2S | R*                    |                  |                      |                 |                |               |     |     |
|      |        | 170                   | 180              | 190                  | 200             | 210            | 220           | 230 | 240 |
| WT   | RDHE2S | VKANHGHLVCISSSIAGLV   | GINGLSDYSSSKFAAF | GFAESLFLELTMIMKTK    | VKSTIVCPYFIKTM  | FEGCTTKYPLLLPL |               |     |     |
| DKO1 | RDHE2S | VKANHGHLVCISSSIAGLV   | GINGLSDYSSSKFAAF | GFAESLF              | FLDLVLR*        |                |               |     |     |
| DKO2 | RDHE2S |                       |                  |                      |                 |                |               |     |     |
|      |        | 250                   | 260              | 270                  | 280             | 290            | 300           | 310 |     |
| WT   | RDHE2S | LEQEYVAQKIFNAILEEQ    | VYLIIIPKFAYVALFL | KQIISP               | KMMIALGEYLGVDTC | MTSFTGRVKA     | EELQMETKRKEQ* |     |     |

**RDHE2 :**

|      |       |                     |                  |                   |                |               |            |       |     |
|------|-------|---------------------|------------------|-------------------|----------------|---------------|------------|-------|-----|
|      |       | 10                  | 20               | 30                | 40             | 50            | 60         | 70    | 80  |
| WT   | RDHE2 | MSQNLESVKNLLVFLGKSL | LSVLEALLFHVISKPR | KNVAGEIVLITGAGSGL | RLLALQFARLGAVL | VLWDVNKEANDET |            |       |     |
| DKO2 | RDHE2 | MSQNLESVKNLLVFLGKSL | LSVLEALLFHVISKPR | KNVAGEIVLITGAGSGL | RLLALQFARLGAVL | VLWDVNKEANDET |            |       |     |
|      |       | 90                  | 100              | 110               | 120            | 130           | 140        | 150   | 160 |
| WT   | RDHE2 | HQLAREAGAARVHAYTCD  | CSRREEVYRVADQVK  | KEVDVSI           | LINNAGIVTGRNFL | DCPDDLMEKSF   | VDVNFKAHLW | MYKAF |     |
| DKO2 | RDHE2 | HQLAREAGAARVHAYTCD  | CSRREEVYRVADQVK  | KEVDVSI           | LINNAGIVTGRNFL | DCPDDLMEKSF   | VDVNFKAHLW | MYKAF |     |
|      |       | 170                 | 180              | 190               | 200            | 210           | 220        | 230   | 240 |
| WT   | RDHE2 | LPAMIANNHGHLVCISS   | SAGLIGVNGLSDY    | CASKFAALGFAESM    | FIIETLAKKQWGI  | KTIVCPFFIKTM  | FEGCTTKCPT |       |     |
| DKO2 | RDHE2 | LPAMIANNHGHLVCISS   | SAGLIGVNGLSG     | VLLCYQFWIQNM      | QLGKS*         |               |            |       |     |
|      |       | 250                 | 260              | 270               | 280            | 290           | 300        | 310   |     |
| WT   | RDHE2 | LLPILDPEYAVRKIIDA   | ILQEQLYLYMPKELY  | FIVFLK            | SILPIKTGILIADY | LGVFHMTEGFTG  | QKKKT*     |       |     |

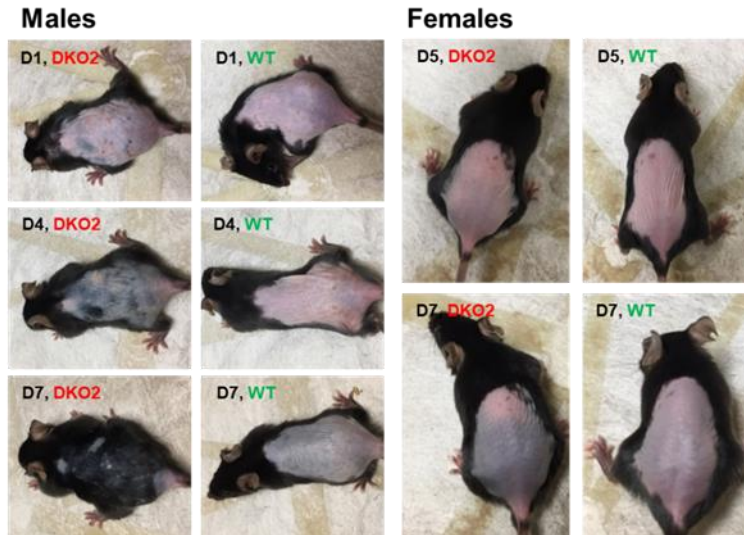

**Figure S4. Hair regrowth in DKO and WT mice on vitamin A deficient diet.** DKO2 mice of both sexes and their WT littermates of the same sex were shaved at ~10 weeks of age. Male mice were photographed on Days 1, 4 and 7 after shaving. Female mice were photographed on Days 5 and 7 after shaving.



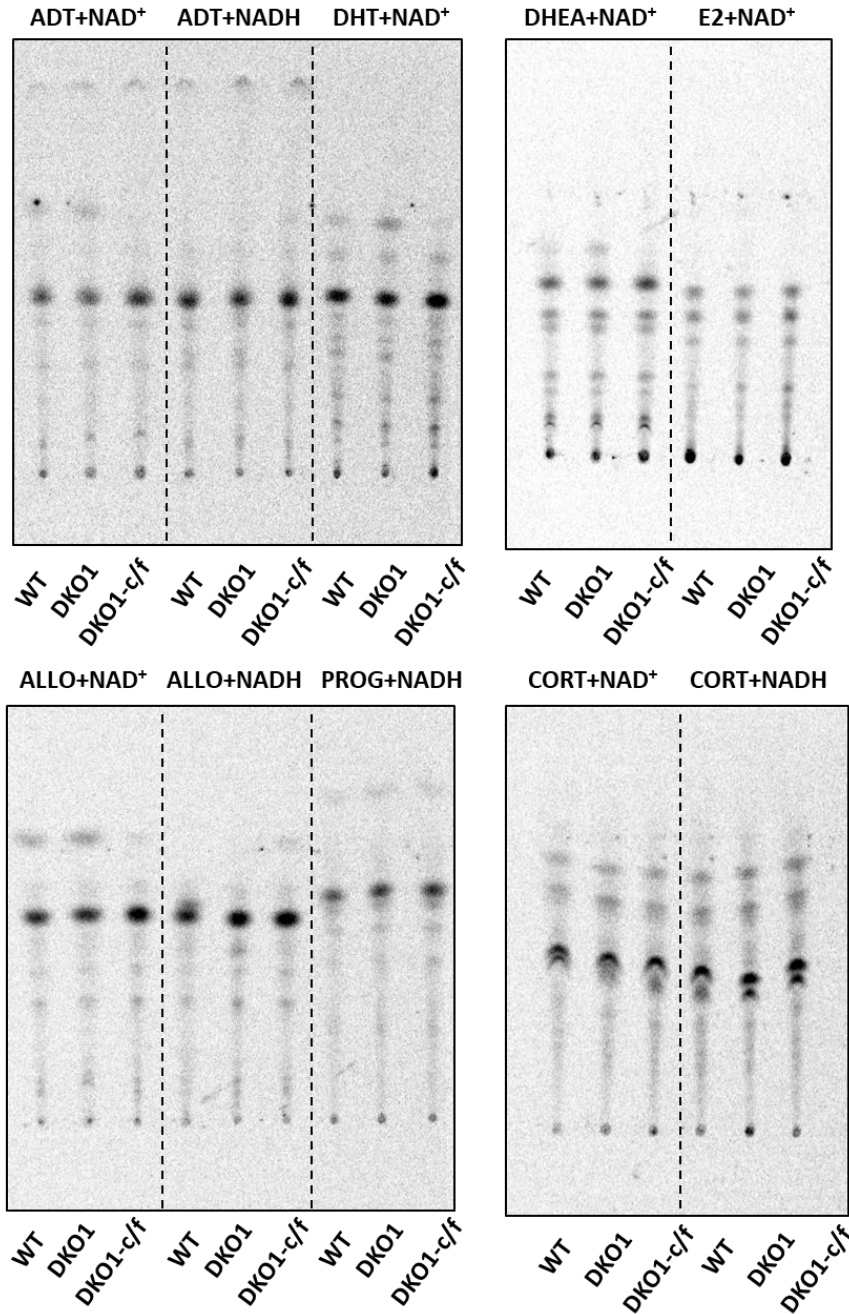

**Figure S5. Thin-layer chromatography analysis of reaction products derived from incubation of skin microsomes with steroid substrates.** Skin microsomal fractions of WT and DKO animals (90  $\mu$ g) were incubated with 3  $\mu$ M [ $^3$ H]-labeled steroids solubilized with bovine serum albumin in the presence or absence of 1 mM NAD(H) cofactor as described in [90]. Incubation was performed in 300- $\mu$ l reaction volume for 75 min at 37  $^{\circ}$ C and steroids were extracted, separated by thin layer chromatography and visualized as described before [90]. Abbreviations are as follows: ADT, androsterone; DHT, dihydrotestosterone; DHEA, dehydroepiandrosterone; E2, estradiol; PROG, progesterone; CORT, corticosterone.
